# Supplementary material for: Detection of CRISPR-Cas9-Mediated Mutations Using a Carbon Nanotube-Modified Electrochemical Genosensor
Source: MDPI journal article supplement (doi:10.3390/bios11010017), 2021-01-08
Supplement: s1 [file s1]

*Supplementary Information*

# Detection of CRISPR–Cas9 Mediated Mutations Using a Carbon Nanotube-Modified Electrochemical Genosensor

**Ezgi Kivrak**<sup>1</sup>, **Tekle Pauzaite**<sup>2,§</sup>, **Nikki A. Copeland**<sup>2</sup>, **John G. Hardy**<sup>3,4</sup>, **Pinar Kara**<sup>1</sup>, **Melike Firlak**<sup>3,5</sup>, **Atike I. Yardimci**<sup>6</sup>, **Selahattin Yilmaz**<sup>6</sup>, **Fahreddin Palaz**<sup>7</sup> and **Mehmet Ozsoz**<sup>8</sup>

<sup>1</sup> Department of Analytical Chemistry, Faculty of Pharmacy, Ege University, Izmir, 35100, Turkey.

<sup>2</sup> Department of Biomedical and Life Sciences, Faculty of Health and Medicine, Lancaster University, Lancaster, Lancashire, LA1 4YQ, UK.

<sup>3</sup> Department of Chemistry, Faculty of Science and Technology, Lancaster University, Lancaster, Lancashire, LA1 4YB, UK.

<sup>4</sup> Materials Science Institute, Lancaster University, Lancaster, Lancashire, LA1 4YB, UK.

<sup>5</sup> Department of Chemistry, Gebze Technical University, Gebze, Kocaeli 41400, Turkey.

<sup>6</sup> Department of Chemical Engineering, Izmir Institute of Technology, İzmir, 35430, Turkey.

<sup>7</sup> Faculty of Medicine, Hacettepe University, Ankara, 06100, Turkey.

<sup>8</sup> Near East University, Faculty of Engineering, Lefkosa TRNC, Via Mersin 10, Turkey.

<sup>§</sup> Present address: Cambridge Institute of Therapeutic Immunology & Infectious Disease (CITIID), Jeffrey Cheah Biomedical Centre, Cambridge Biomedical Campus, University of Cambridge, Cambridge CB2 0AW, UK.

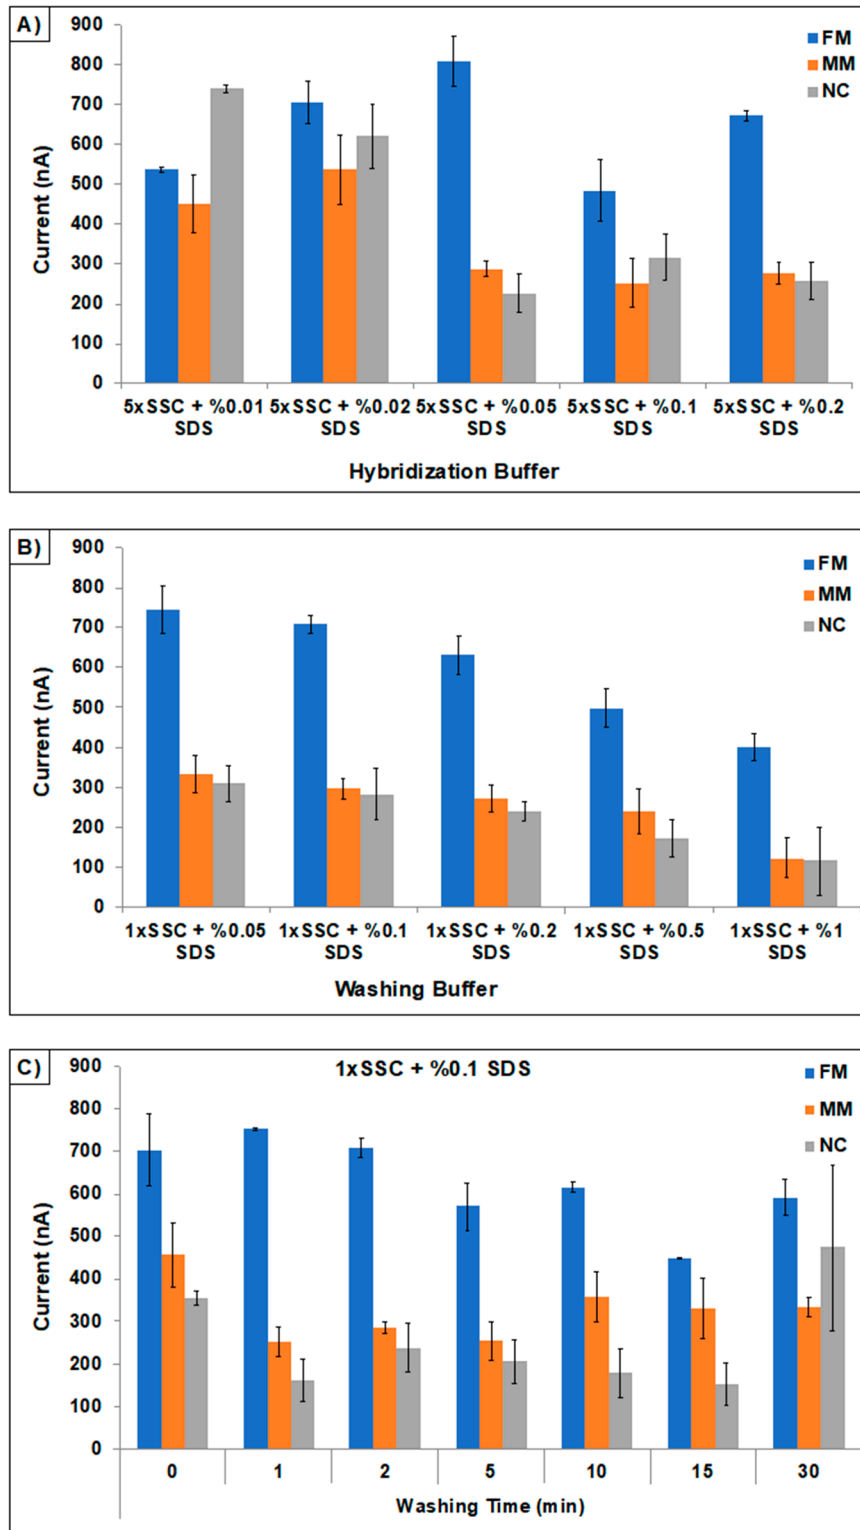

**Figure S1.** Histograms of optimized conditions in order to maximize the genosensors selectivity. After determining optimum conditions for both probe (5  $\mu\text{g}/\text{mL}$ ) and target (5  $\mu\text{g}/\text{mL}$ ) concentrations, the effects of the A) hybridization buffer, B) washing buffer and C) washing time was investigated. For each parameter probe and target concentrations were kept constant at the optimized conditions.

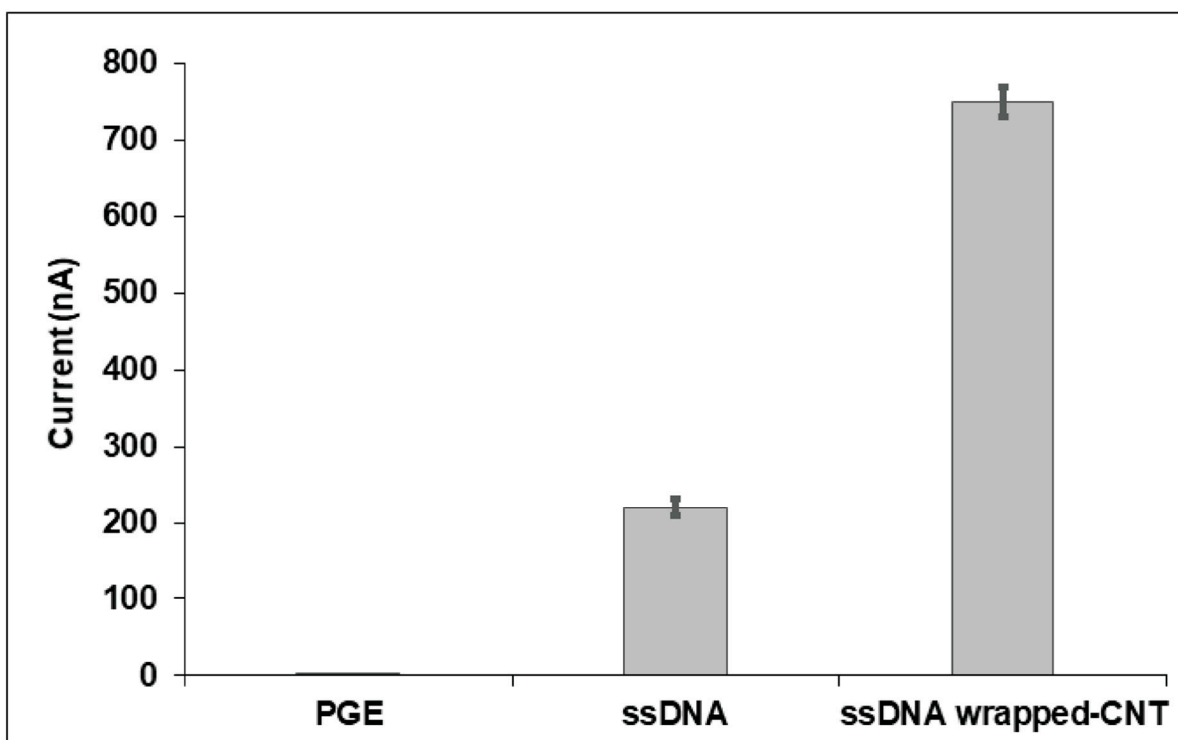

**Figure S2.** Histogram chart of guanine oxidation current peaks obtained from DPV measurements and comparison with bare PGE surfaces, ssDNA immobilized PGEs and ssDNA wrapped-CNT immobilized PGEs.

**Table S1.** The effect of various optimization conditions (probe concentrations) on analytical response of FM/MM and FM/NC ratios for the proposed genosensors. Underlined values are attributed to the optimized conditions for each parameter.

|       | Probe concentrations ( $\mu\text{g/mL}$ ) |      |      |      |      |             |      |
|-------|-------------------------------------------|------|------|------|------|-------------|------|
|       | 0.1                                       | 0.2  | 0.5  | 1    | 2    | 5           | 10   |
| FM/MM | 1.77                                      | 1.41 | 1.54 | 1.53 | 1.60 | <u>2.15</u> | 2.07 |
| FM/NC | 1.22                                      | 1.28 | 1.11 | 1.17 | 1.22 | <u>2.96</u> | 1.26 |

**Table S2.** The effect of various optimization conditions (target concentrations) on analytical response of FM/MM and FM/NC ratios for the proposed genosensors. Underlined values are attributed to the optimized conditions for each parameter.

|       | Target concentrations ( $\mu\text{g/mL}$ ) |      |      |      |      |             |      |      |      |
|-------|--------------------------------------------|------|------|------|------|-------------|------|------|------|
|       | 0.1                                        | 0.2  | 0.5  | 1    | 2    | 5           | 10   | 15   | 20   |
| FM/MM | 3.40                                       | 2.25 | 1.48 | 2.14 | 1.99 | <u>2.33</u> | 2.48 | 2.15 | 2.16 |
| FM/NC | 2.52                                       | 1.75 | 1.77 | 1.80 | 2.71 | <u>1.91</u> | 1.79 | 1.61 | 1.94 |

**Table S3.** The effect of various optimization conditions (hybridization buffer) analytical response of FM/MM and FM/NC ratios for the proposed genosensors. Underlined values are attributed to the optimized conditions for each parameter.

|       | Hybridization buffer |                      |                      |                     |                     |
|-------|----------------------|----------------------|----------------------|---------------------|---------------------|
|       | 5xSSC +<br>%0.01 SDS | 5xSSC +<br>%0.02 SDS | 5xSSC +<br>%0.05 SDS | 5xSSC +<br>%0.1 SDS | 5xSSC +<br>%0.2 SDS |
| FM/MM | 1.19                 | 1.26                 | <u>2.72</u>          | 1.92                | 1.98                |
| FM/NC | 0.84                 | 1.17                 | <u>3.73</u>          | 1.53                | 2.73                |

**Table S4.** The effect of various optimization conditions (washing buffer) on analytical response of FM/MM and FM/NC ratios for the proposed genosensors. Underlined values are attributed to the optimized conditions for each parameter.

|       | Washing buffer       |                     |                     |                     |                   |
|-------|----------------------|---------------------|---------------------|---------------------|-------------------|
|       | 1xSSC +<br>%0.05 SDS | 1xSSC +<br>%0.1 SDS | 1xSSC +<br>%0.2 SDS | 1xSSC +<br>%0.5 SDS | 1xSSC +<br>%1 SDS |
| FM/MM | 2.23                 | <u>2.43</u>         | 2.31                | 2.07                | 3.24              |
| FM/NC | 2.40                 | <u>2.77</u>         | 2.61                | 2.90                | 3.45              |

**Table S5.** The effect of various optimization conditions (washing time) on analytical response of FM/MM and FM/NC ratios for the proposed genosensors. Underlined values are attributed to the optimized conditions for each parameter.

|       | Washing time (minutes) |      |             |      |      |      |
|-------|------------------------|------|-------------|------|------|------|
|       | 0                      | 1    | 2           | 5    | 10   | 30   |
| FM/MM | 1.54                   | 2.98 | <u>2.48</u> | 2.25 | 1.72 | 1.77 |
| FM/NC | 1.98                   | 4.66 | <u>2.97</u> | 2.76 | 3.46 | 1.29 |

**Table S6.** Mean and RSD values by the means of FM-MM-NC results of both synthetic and PCR amplicons under optimized conditions.

|                           |           | Mean (nA) | RSD (%) |
|---------------------------|-----------|-----------|---------|
| <b>Synthetic sequence</b> | <b>FM</b> | 753.00    | 0.38    |
|                           | <b>MM</b> | 252.67    | 14.05   |
|                           | <b>NC</b> | 161.67    | 30.16   |
| <b>PCR Amplicon</b>       | <b>FM</b> | 1385.00   | 3.03    |
|                           | <b>MM</b> | 430.45    | 11.65   |
|                           | <b>NC</b> | 206.33    | 24.91   |
